# Supplementary material
Source: MDPI journal article supplement (https://www.mdpi.com/2073-445X/9/10/377)

**Figure S1.** The importance of input variables for the commodity maps by mean decrease Gini coefficient values. BX variable represents the spectral value of band X, ND\_BX\_BY indicates the covariates between band X and band Y. elevation, slope, eastness, northness, and aspect were the topographical variables. change\_abs, change\_norm, transition, occurrence, max\_extent, and seasonality were surface water predictors from JRC. We also used several spectral indices for the predictors – i.e. EVI, SAVI, and IBI.

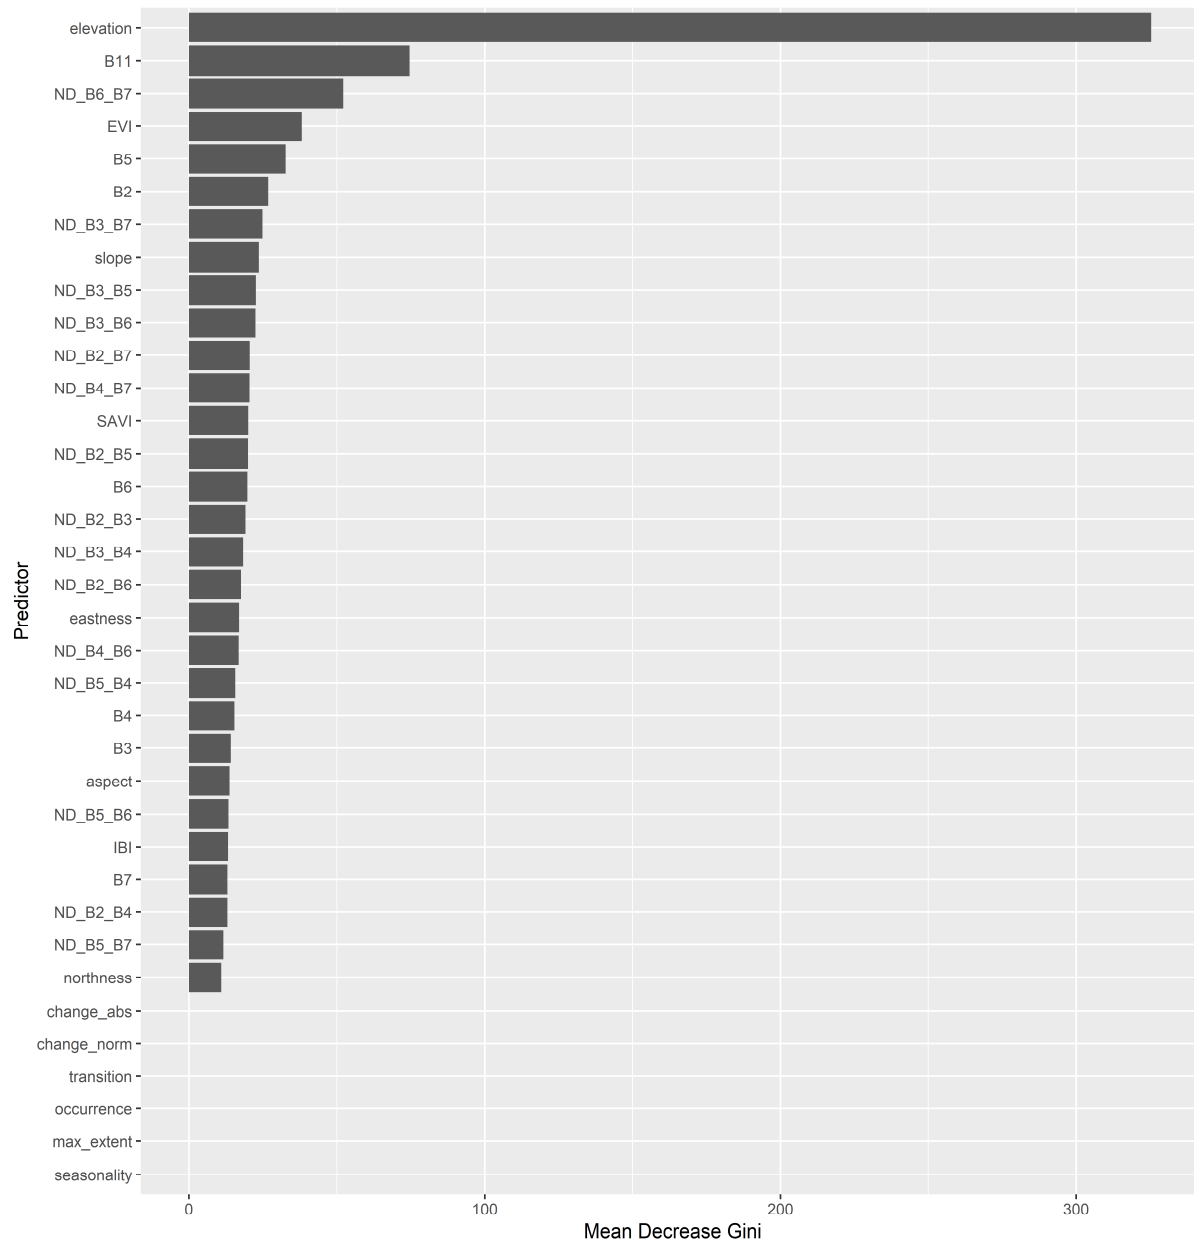

**Figure S2.** Comparison between provincial reference data (BPS) and our maps by province for **(A)** oil palm commodity and **(B)** paddy rice field commodity.

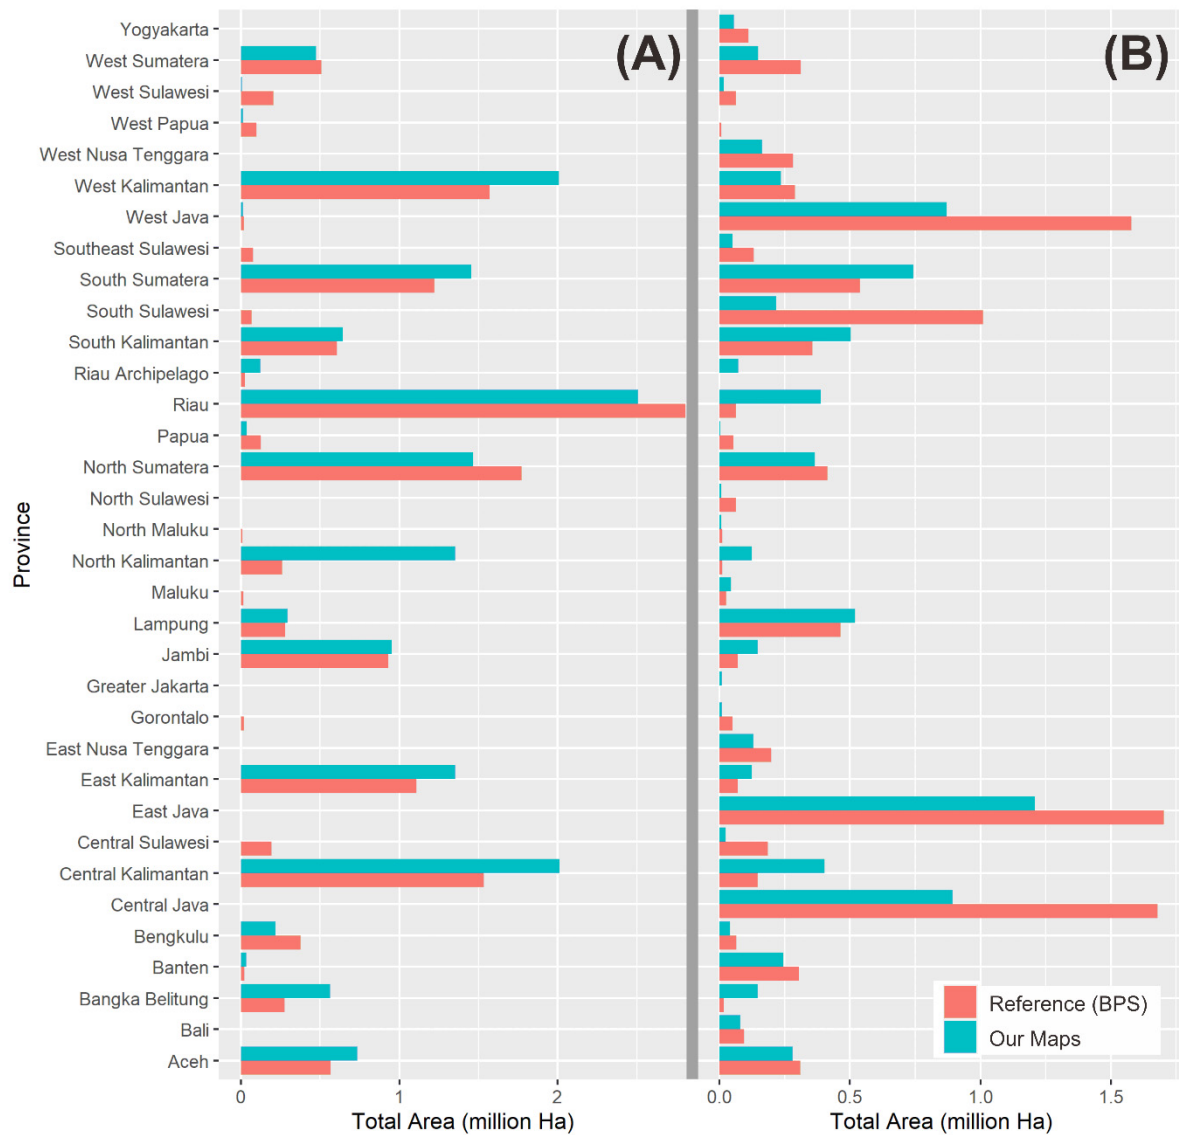

Supplement: s1 [file s1]
